# Supplementary material for: Molecular modelling of Jahn–Teller distortions in Cu(ii)N6complexes: elongations, compressions and the pathways in between
Source: Royal Society of Chemistry journal article supplement (doi:10.1039/b509274d), 2005-11-22
Supplement: b509274d.pdf [file b509274d.pdf]

## The Jahn-Teller Effect in Cu(II) Complexes: Comprehensive Molecular Modelling for Elongations, Compressions and All Points Inbetween

Robert J. Deeth\* and Laura J. A. Hearnshaw

### Supporting Information

Table S1: rms and individual bond length deviations (LFMM-X-ray)

| Refcode  | rms   | Cu-N1         | Cu-N2         | Cu-N3  | Cu-N4        | Cu-N5  | Cu-N6         |
|----------|-------|---------------|---------------|--------|--------------|--------|---------------|
| TERPYC01 | 0.027 | -0.007        | -0.041        | -0.043 | -0.022       | -0.007 | -0.021        |
| DEQSOH   | 0.036 | 0.006         | -0.030        | 0.070  | 0.021        | -0.022 | 0.029         |
| XUTYOA   | 0.090 | 0.008         | 0.108         | 0.048  | <b>0.160</b> | 0.093  | -0.002        |
| JUNDAX   | 0.076 | <b>-0.124</b> | <b>-0.124</b> | 0.032  | 0.032        | -0.026 | -0.026        |
| LOYSAT   | 0.079 | 0.049         | 0.049         | 0.064  | 0.063        | -0.112 | -0.112        |
| WOHSAN   | 0.077 | -0.104        | 0.100         | -0.010 | 0.004        | 0.019  | <b>-0.121</b> |
| KAYTOT   | 0.043 | 0.056         | 0.056         | 0.038  | 0.037        | -0.030 | -0.031        |
| SAFLEQ   | 0.049 | 0.050         | 0.047         | -0.065 | 0.032        | -0.056 | -0.039        |
| LABJEE   | 0.069 | <b>0.121</b>  | 0.005         | 0.027  | -0.052       | -0.019 | -0.102        |
| Cu(AM)6  | 0.051 | -0.088        | -0.005        | -0.005 | -0.088       | -0.006 | -0.006        |
| KIQNAZ   | 0.018 | -0.014        | -0.008        | -0.027 | -0.013       | -0.008 | -0.028        |
| FUPJEF   | 0.033 | -0.057        | 0.006         | 0.010  | -0.057       | 0.006  | 0.010         |
| TACCUP   | 0.025 | -0.034        | -0.035        | 0.017  | 0.019        | 0.018  | 0.020         |
| LOMREK   | 0.071 | 0.019         | 0.037         | 0.116  | 0.036        | 0.019  | 0.116         |
| NIJYAG   | 0.068 | -0.039        | -0.072        | 0.083  | -0.031       | -0.080 | 0.084         |
| LUBXAH01 | 0.023 | -0.023        | 0.025         | -0.020 | 0.025        | -0.024 | -0.019        |
| SOFPAE   | 0.064 | 0.026         | -0.099        | 0.045  | 0.026        | -0.099 | 0.045         |
| PEFQIA01 | 0.053 | -0.008        | 0.004         | 0.011  | 0.043        | -0.100 | -0.071        |
| PEFQEW01 | 0.054 | 0.072         | -0.009        | 0.035  | -0.019       | -0.066 | -0.079        |
| XAJBAL   | 0.056 | -0.026        | -0.001        | 0.095  | -0.059       | -0.048 | -0.056        |
| XAHZUB   | 0.054 | -0.083        | -0.044        | -0.022 | -0.054       | -0.054 | -0.049        |

Table S2: terpy data

| Refcode  | Structure          |
|----------|--------------------|
| BEJPUB   | compressed         |
| KOFQAX   | elongated          |
| NELKEU   | compressed         |
| NIQTAI   | compressed         |
| PULCAA   | elongated          |
| SIBWEF   | rhombic compressed |
| SIMJAZ   | rhombic compressed |
| TERPYC01 | elongated          |

Table S3: phen data

| Refcode | Structure          |
|---------|--------------------|
| AGOJIP  | rhombic compressed |
| CAJSUC  | rhombic            |
| DEQSOH  | elongated          |
| EGAXUF  | elongated          |
| IKUCIA  | elongated          |
| IVUPIY  | elongated          |
| JANLIT  | compressed         |
| NILTEH  | elongated          |
| PENCUC  | elongated          |
| UKEVAH  | compressed         |

Electronic Supplementary Information for Dalton Transactions  
This journal is © The Royal Society of Chemistry 2005

WUTXAK      elongated
